# Supplementary material for: Estimating Genome-Wide Significance for Whole-Genome Sequencing Studies
Source: PubMed Central journal article supplement (PMC4489336; doi:10.1002/gepi.21797), 2014-02-14
Supplement: gepi0038-0281-sd1.pdf [file gepi0038-0281-sd1.pdf]

## **Estimating genome-wide significance for whole genome sequencing studies**

**ChangJiang Xu, Ioanna Tachmazidou, Klaudia Walter, Antonio Ciampi, Eleftheria Zeggini, Celia M.T. Greenwood, and the UK10K Consortium**

### **Supplemental Figures and Tables.**

Pages 2-4: Supplemental Figures S1a – S1c.

Correlations between 2000 adjacent window-based tests statistics for SKAT and burden tests and for two different MAF thresholds.

Page 5: Supplementary Figure S2.

Estimates of significance thresholds for window-based tests of rare variants, for different sample sizes. Results are derived using a MAF threshold of 0.01.

Page 6: Supplementary Figure S3.

Estimates of significance thresholds for window-based tests of rare variants, for different sample sizes. Results are derived using a MAF threshold of 0.05.

Page 7: Supplemental Figure S4.

Estimates of significance thresholds for single-SNP tests of common variants.

Page 8: Supplemental Table S1.

Estimated genome-wide significance thresholds for window-based testing, corresponding to results in Figure 2.

Page 9: Supplemental Table S2.

Estimated genome-wide significance thresholds for tests of single common SNPs.

### Supplemental Figures S1a – S1c.

Correlations between 2000 adjacent window-based tests statistics for SKAT and burden tests and for two different MAF thresholds. Since windows were defined to contain the same number of rare variants, the boundaries of the windows vary with MAF. Regions have been aligned so that the genomic region captured in the bottom row is contained within the genomic region at the top. The axes are the window numbers, counted from the 5' end of chromosome 3. Left column: SKAT tests. Right column: burden tests. Top row: MAF threshold =0.01; bottom row: MAF threshold=0.05. Gray: correlation>0.1; Yellow: correlation>0.35; Blue: correlation>0.5; Red: correlation>0.75. S1a: Windows 1-2000. S1b: Windows 36,250-38,250. S1c: Windows 54,500-56,500.

Figure S1a

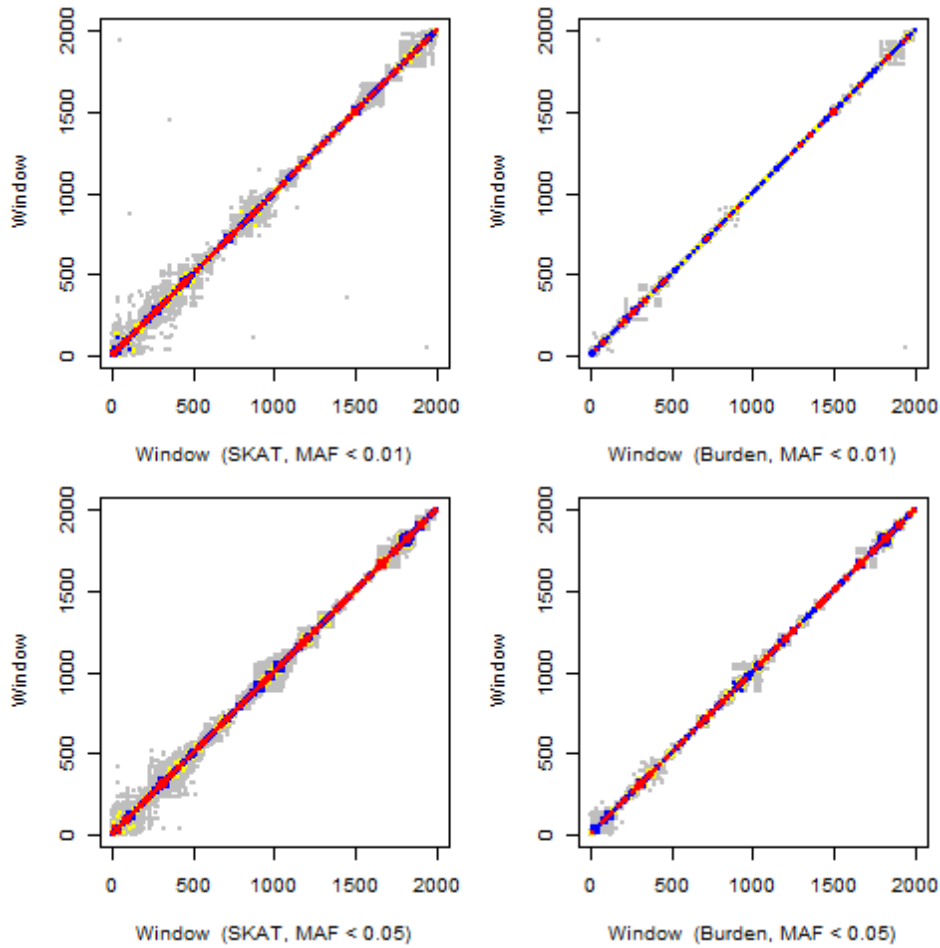

Figure S1b

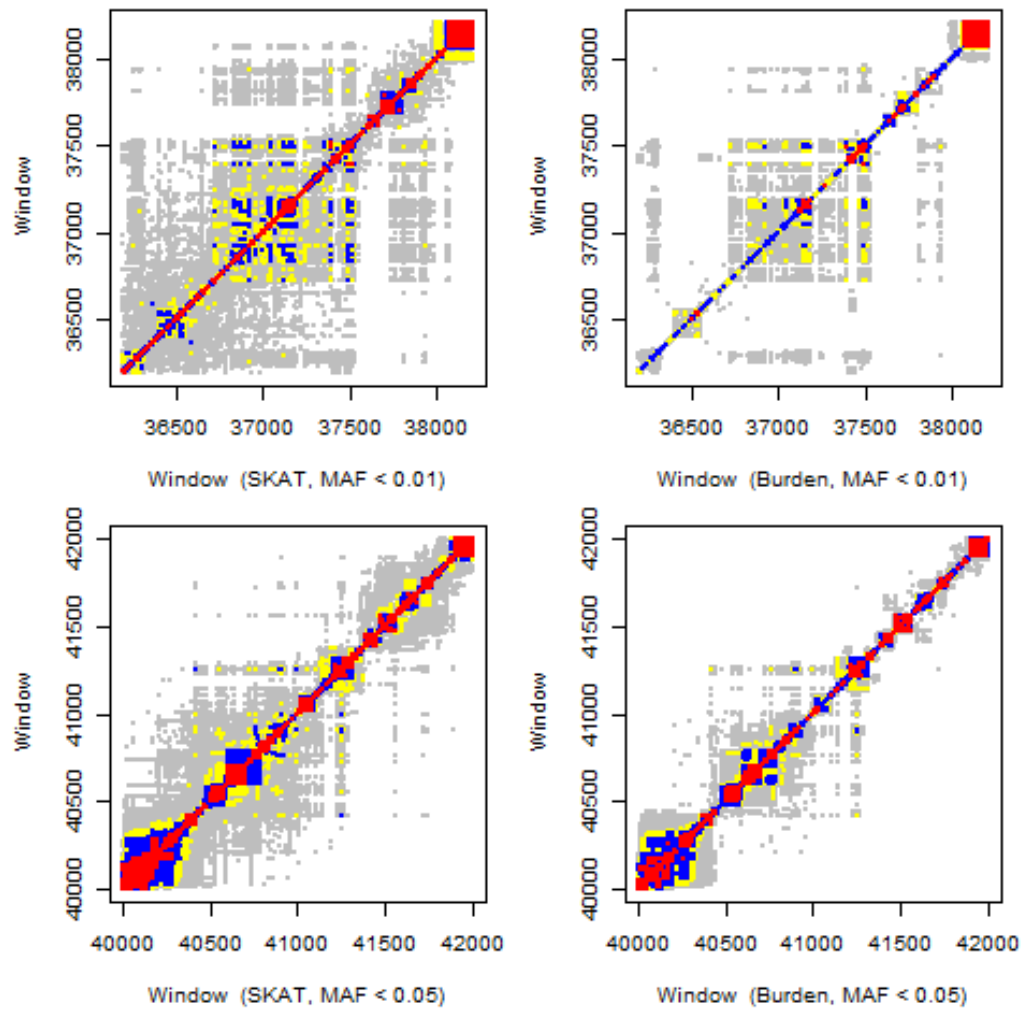

Figure S1c

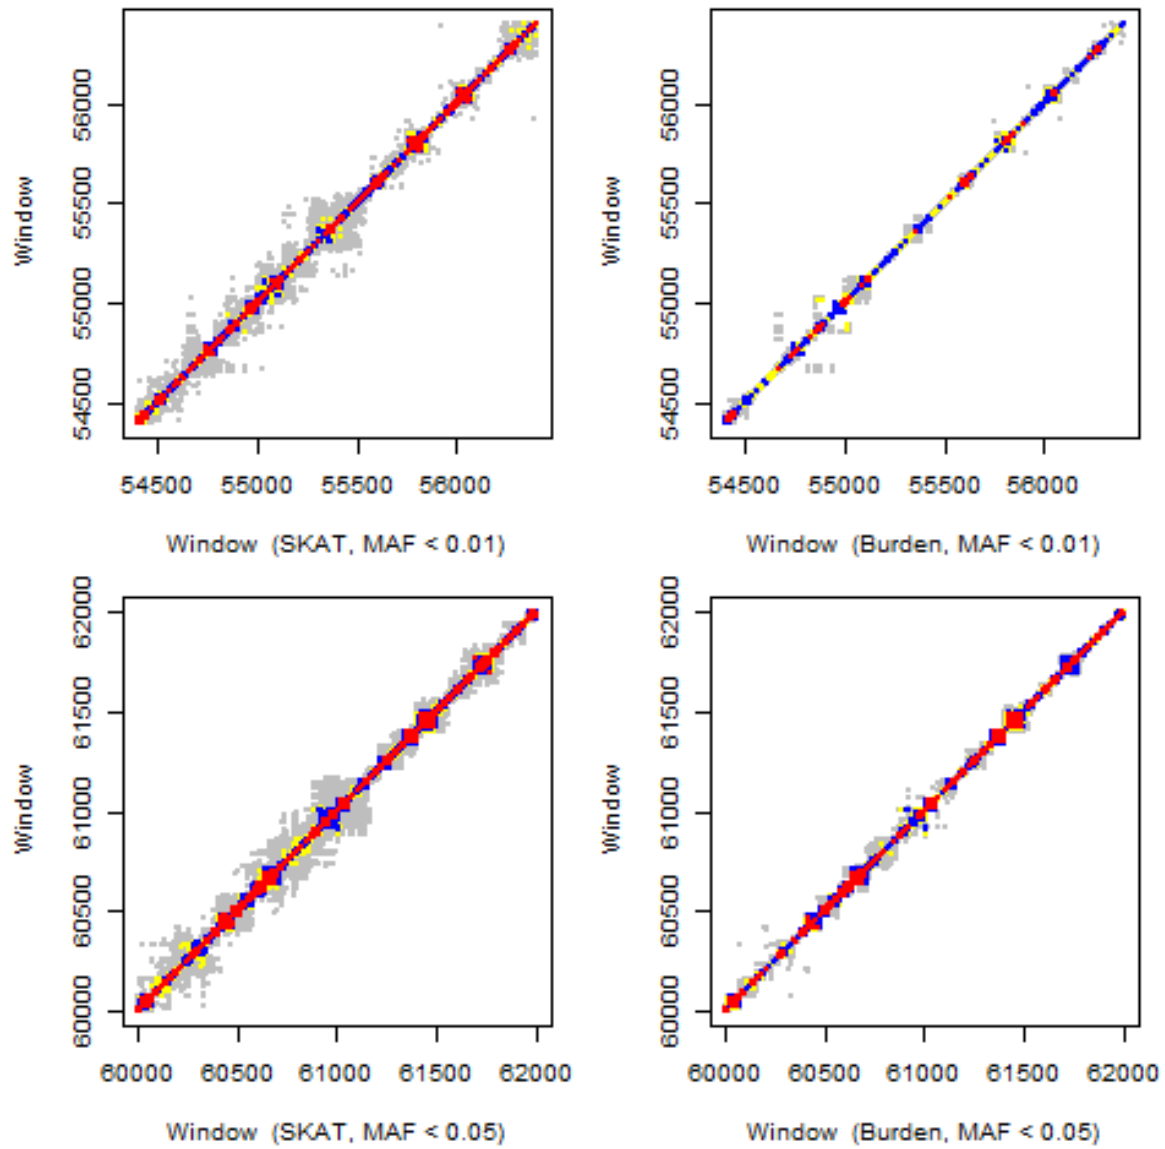

### Supplementary Figure S2.

Estimates of significance thresholds for window-based tests of rare variants, for different sample sizes. Results are derived using a MAF threshold of 0.01. The x-axis is  $-\log_{10}$  of the Bonferroni correction, i.e.  $-\log_{10}(0.05/m)$ , where  $m$  is the number of tests performed in sub-sections of chromosome 3 of varying sizes. The vertical axis shows the estimates of the significance thresholds obtained by each method or for each sample size. The mean, and 95% confidence interval for the mean, summarize the results across sections of chromosome 3 of the same size. Lines for different sample sizes lie almost on top of each other.

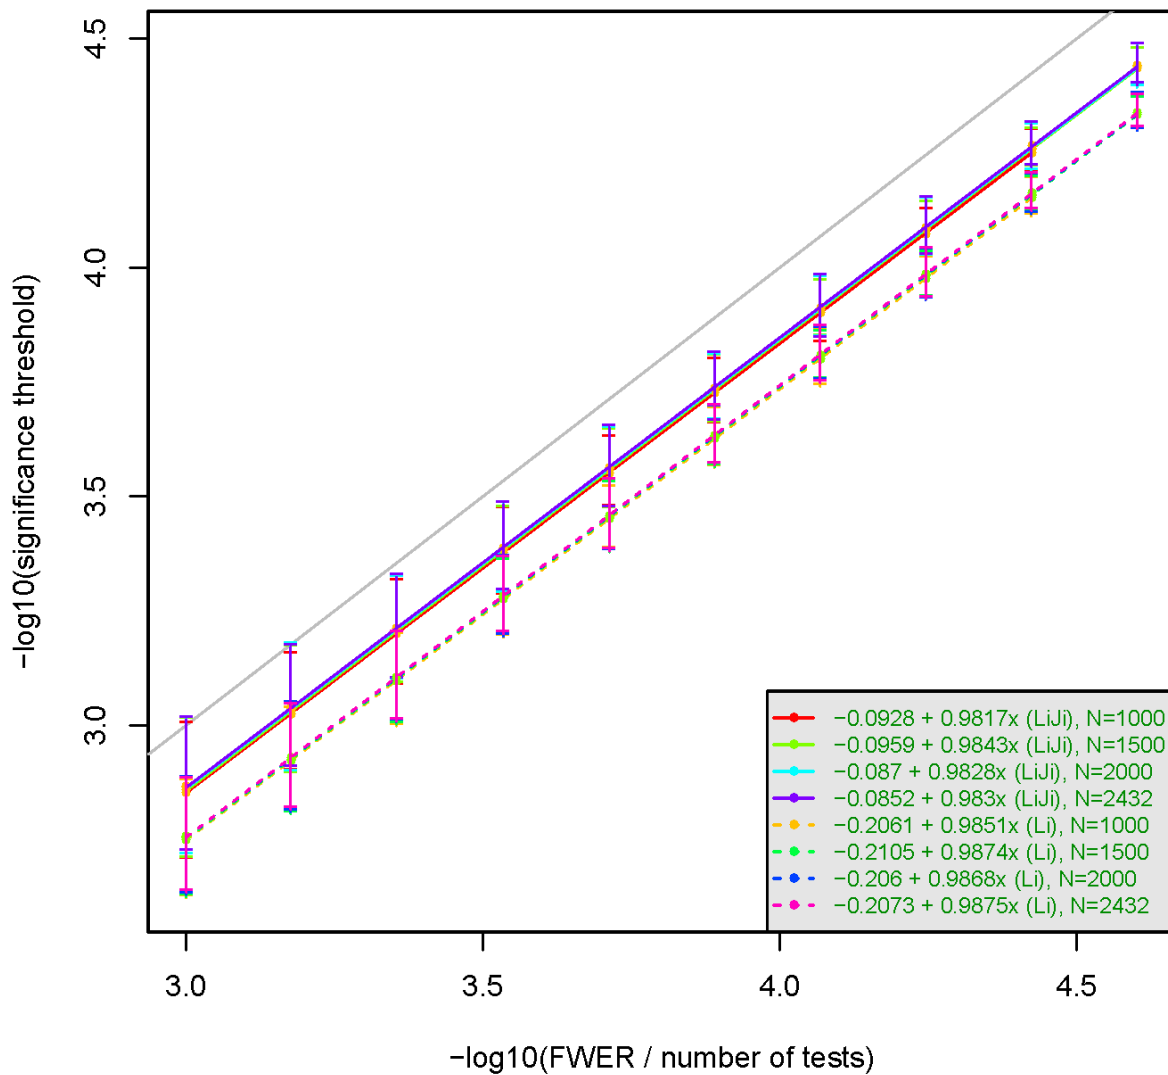

### Supplementary Figure S3.

Estimates of significance thresholds for window-based tests of rare variants, for different sample sizes. Results are derived using a MAF threshold of 0.05. The x-axis is  $-\log_{10}$  of the Bonferroni correction, i.e.  $-\log_{10}(0.05/m)$ , where  $m$  is the number of tests performed in sub-sections of chromosome 3 of varying sizes. The vertical axis shows the estimates of the significance thresholds obtained by each method or for each sample size. The mean, and 95% confidence interval for the mean, summarize the results across sections of chromosome 3 of the same size. Lines for different sample sizes lie almost on top of each other.

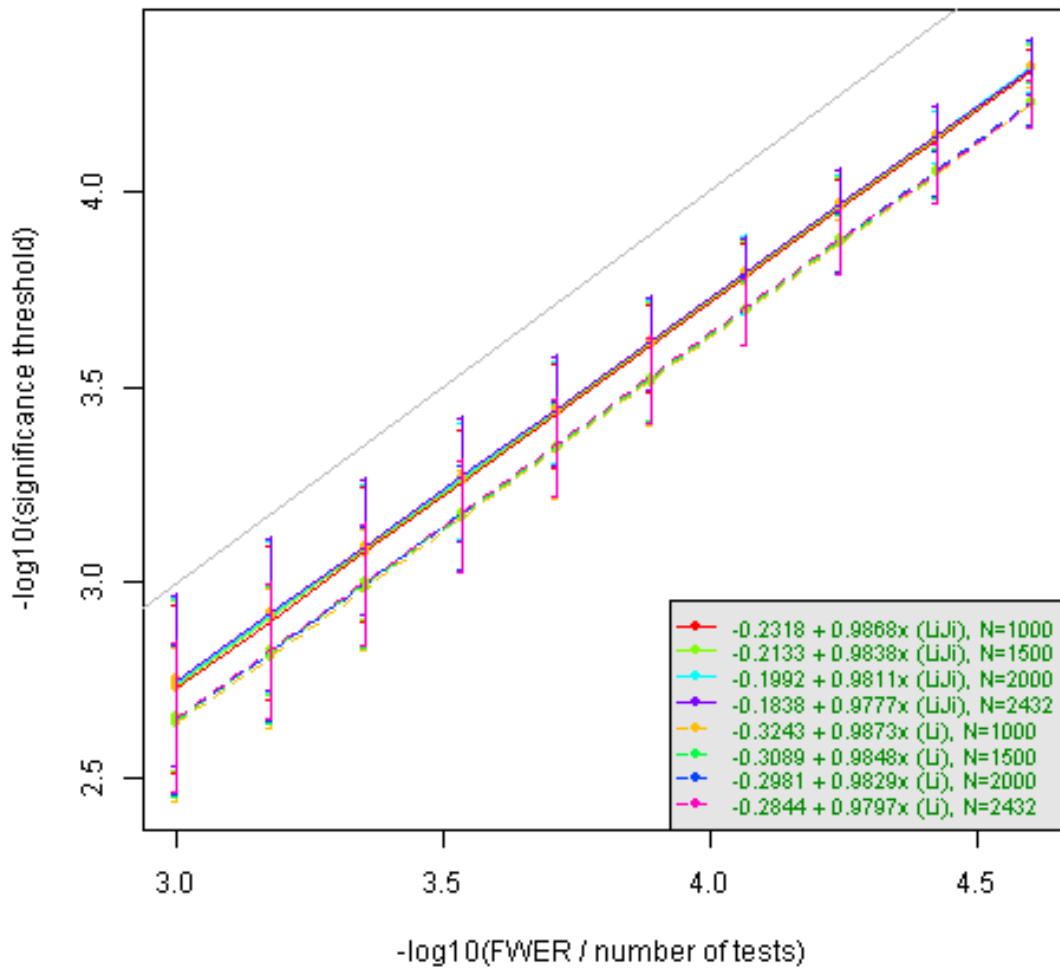

### Supplemental Figure S4.

Estimates of significance thresholds for single-SNP tests of common variants. Results are derived using a sample size of 2,432. The x-axis is  $-\log_{10}$  of the Bonferroni correction, i.e.  $-\log_{10}(0.05/m)$ , where  $m$  is the number of tests performed in sub-sections of chromosome 3 of varying sizes. The vertical axis shows the estimates of the significance thresholds obtained for three different MAF thresholds defining common variants. The mean, and 95% confidence interval for the mean, summarize the results across sections of chromosome 3 of the same size. Extrapolations to the approximate size of the full genome are shown.

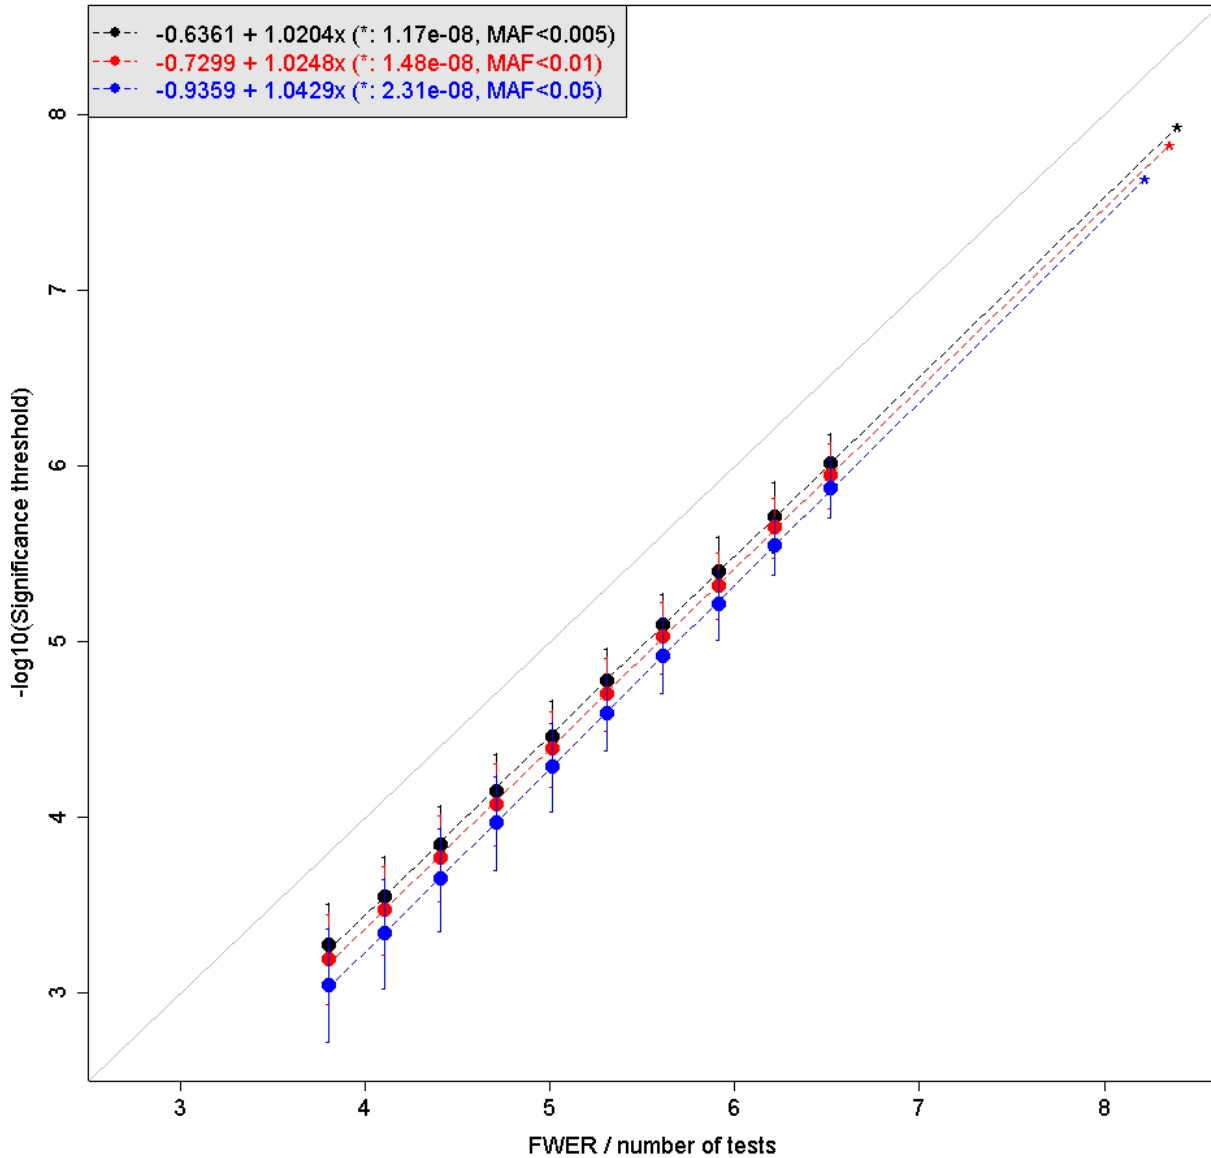

**Supplemental Table S1.**

Estimated genome-wide significance thresholds for window-based testing, corresponding to results in Figure 2. Estimates are derived from expected correlations.

| MAF threshold defining rare variants | Test statistic | Method for estimating effective number of independent tests | Estimate of the number of independent tests on chromosome 3 | Genome-wide estimate of the number of independent tests | Predicted genome-wide significance threshold |
|--------------------------------------|----------------|-------------------------------------------------------------|-------------------------------------------------------------|---------------------------------------------------------|----------------------------------------------|
| 0.01                                 | SKAT           | Li and Ji                                                   | 48,606                                                      | 730,252                                                 | 6.85e-08                                     |
| 0.01                                 | SKAT           | Li et al.                                                   | 38,907                                                      | 590,030                                                 | 8.47e-08                                     |
| 0.01                                 | Burden         | Li and Ji                                                   | 66,577                                                      | 1,035,006                                               | 4.83e-08                                     |
| 0.01                                 | Burden         | Li et al.                                                   | 54,664                                                      | 850,773                                                 | 5.88e-08                                     |
|                                      |                |                                                             |                                                             |                                                         |                                              |
| 0.05                                 | SKAT           | Li and Ji                                                   | 40,332                                                      | 602,977                                                 | 8.29e-08                                     |
| 0.05                                 | SKAT           | Li et al.                                                   | 32,872                                                      | 493,618                                                 | 10.13e-08                                    |
| 0.05                                 | Burden         | Li and Ji                                                   | 58,284                                                      | 903,229                                                 | 5.54e-08                                     |
| 0.05                                 | Burden         | Li et al.                                                   | 48,322                                                      | 750,843                                                 | 6.66e-08                                     |



**Supplemental Table S2.**

Estimated genome-wide significance thresholds for tests of single common SNPs. Results correspond to Supplemental Figure S4. Results are obtained from simulations under the null hypothesis on chromosome 3. For comparison, the last row shows the number of common SNPs in 1000 Genomes European data.

| <b>MAF threshold defining common SNPs</b>                             | <b>MAF<math>\geq</math>0.005</b> | <b>MAF<math>\geq</math>0.01</b> | <b>MAF<math>\geq</math>0.05</b> |
|-----------------------------------------------------------------------|----------------------------------|---------------------------------|---------------------------------|
| Number of common SNPs on chromosome 3 in UK10K pilot data             | 798,175                          | 723,751                         | 531,208                         |
| Estimated number of common SNPs genome-wide                           | 12,451,530                       | 11,290,516                      | 8,286,845                       |
| Estimated number of independent test statistics                       | 4,268,111                        | 3,385,954                       | 2,164,077                       |
| Estimated significance threshold                                      | 1.17e-08                         | 1.48e-08                        | 2.31e-08                        |
| Number of common SNPs on chromosome 3 from 1000 Genomes European data | 773,690                          | 665,639                         | 464,048                         |
